# Supplementary material for: A label-free fluorescent sensor for Pb2+based on G-quadruplex and graphene oxide
Source: Royal Society of Chemistry journal article supplement (doi:10.1039/c4ay01389a), 2014-08-29
Supplement: c4ay01389a1.pdf [file c4ay01389a1.pdf]

## Electronic supplementary information

# A label-free fluorescent sensor for Pb<sup>2+</sup> based on G-quadruplex and graphene oxide

Yunfeng Bai,<sup>ab</sup> Lu zhao,<sup>a</sup> Zezhong Chen,<sup>a</sup> Haiyan Wang<sup>a</sup> and Feng Feng<sup>\*ab</sup>

<sup>a</sup> College of Chemistry and Chemical Engineering, Shanxi Datong University, Datong 037009, P. R. China. E-mail: feng-feng64@263.net; Fax: +86-352-6100028; Tel: +86-352-7158662

<sup>b</sup> School of Chemistry and Materials Science, Shanxi Normal University, Linfen 041004, P. R. China.

### Experimental Section

#### Materials and reagents

Graphene oxide dispersion (2 mg/mL) was purchased from XF Nano (Nanjing, China). G-rich oligonucleotide (AGRO100: 5'-GGT GGT GGT GGT TGT GGT GGT GGT GG-3') was synthesized and HPLC purified by Shanghai Sangon Biotechnology Co. Ltd (Shanghai, China). Tris(hydroxymethyl)aminomethane (Tris) and AO were purchased from Sigma-Aldrich (St. Louis, MO, USA). All other chemicals were of analytical grade and used without further purification. All work solutions were prepared with 10 mM Tris-HAc buffer (pH 7.4). Deionized water was used for the preparation of aqueous solution.

#### Apparatus

F-2500 fluorescence spectrophotometer (Hitachi, Japan) was used to collect the fluorescence spectra with a scan rate of 1500 nm/min. The excitation wavelength was 490 nm, and the photomultiplier tube (PMT) voltage was 400 V. The slit widths for excitation and emission were both set at 10 nm. The optical path length of a quartz fluorescence cell was 1.0 cm. Fluorescence anisotropy was measured by a LS 55 fluorescence spectrometer (PerkinElmer, American) with an excitation wavelength at 490 nm and an emission wavelength at 524 nm.

#### Fluorescence determination of Pb<sup>2+</sup>

The AGRO100 solution was heated at 90 °C for 10 min to dissociate any intermolecular interaction, and gradually cooled to room temperature. A solution containing 200 nM of AGRO100, 200 nM of AO and different concentrations of Pb<sup>2+</sup> was incubated for 1 h at room temperature, then GO was added into the solution to make the final volume 1 ml. The final concentration of GO was 5 µg/ml. After the mixture was incubated for 10 min, the fluorescence emission spectra were recorded with an excitation wavelength of 490 nm. The same procedures were repeated in the presence of other metal ions instead of Pb<sup>2+</sup> to assess the selectivity.

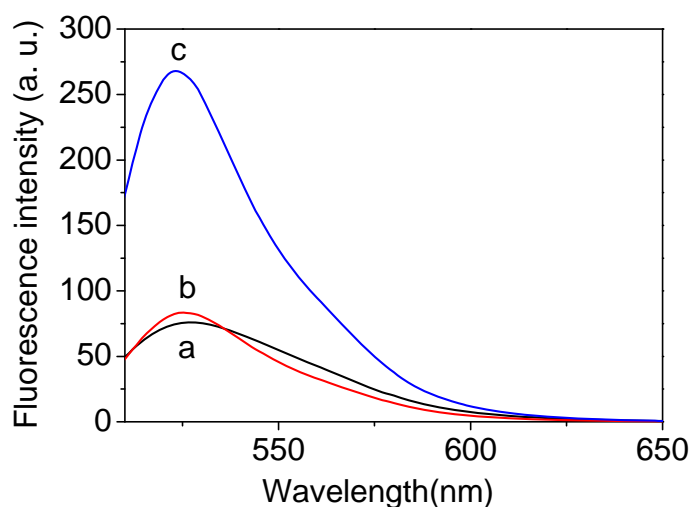

Fig. s1 Fluorescence emission spectra of AO under different conditions: (a) AO; (b) AO + AGRO100; (c) AO + AGRO100 + Pb<sup>2+</sup>. Concentrations of AO, AGRO100 and Pb<sup>2+</sup> are 200 nM, 200 nM and 1  $\mu$ M, respectively. The excitation wavelength is 490 nm.

Table s1 Performance comparison of this work with other oligonucleotide-based sensors for Pb<sup>2+</sup> detection.

| Analytical method | Sensor strategy                            | Linear range | Detection limit | Real sample               | Ref.      |
|-------------------|--------------------------------------------|--------------|-----------------|---------------------------|-----------|
| Fluorescence      | G-quadruplex/ GO/ AO                       | 5 – 300 nM   | 3 nM            | Lake water<br>Tap water   | This work |
| Fluorescence      | G-quadruplex/ ZnPPIX                       | 20 – 1000 nM | 20 nM           | Not reported              | 1         |
| Fluorescence      | G-quadruplex/ PMNT                         | 0 – 120 nM   | 6 nM            | Tap water                 | 2         |
| Fluorescence      | Single labeled G-quadruplex/ GO            | 2 – 50 nM    | 0.4 nM          | Tap water                 | 3         |
| Fluorescence      | Single labeled G-quadruplex/ GO            | 0.1 – 10 nM  | 90 pM           | River water               | 4         |
| Fluorescence      | G-quadruplex/ SYBR Green 1                 | 10 – 100 nM  | 3 nM            | Hair sample               | 5         |
| Fluorescence      | G-quadruplex DNAzyme/ AUR                  | 0 – 1000 nM  | 0.4 nM          | Soil sample               | 6         |
| Fluorescence      | Double labeled G-quadruplex                | 0.5 – 30 nM  | 0.3 nM          | Soil sample               | 7         |
| Fluorescence      | G-quadruplex/ DSA derivate/<br>Nuclease S1 | 0 – 600 nM   | 60 nM           | Not reported              | 8         |
| Fluorescence      | G-quadruplex/ NMM                          | 10 – 100 nM  | 5 nM            | Tap water                 | 9         |
| Fluorescence      | Single labeled G-quadruplex                | 0.5 – 500 nM | 0.4 nM          | Tap water                 | 10        |
| Fluorescence      | G-quadruplex/ NMM                          | 5 – 1000 nM  | 1 nM            | Lake water                | 11        |
| Fluorescence      | G-quadruplex/ Tb <sup>3+</sup>             | 3 – 50 nM    | 1 nM            | Soil sample<br>Pond water | 12        |

## References

1. T. Li, S. Dong and E. Wang, *J. Am. Chem. Soc.*, 2010, **132**, 13156.
2. Y. Lu, X. Li, G. Wang and W. Tang, *Biosens. Bioelectron.*, 2013, **39**, 231.
3. X. Li, G. Wang, X. Ding, Y. Chen, Y. Gou and Y. Lu, *Phys. Chem. Chem. Phys.*, 2013, **15**, 12800.

4. M. Li, X. Zhou, S. Guo and N. Wu, *Biosens. Bioelectron.*, 2013, **43**, 69.
5. L. Zhang, N. Mi, Y. Zhang, M. Wei, H. Li and S. Yao, *Anal. Methods*, 2013, **5**, 6100.
6. C.-L. Li, K.-T. Liu, Y.-W. Lin and H.-T. Chang, *Anal. Chem.*, 2011, **83**, 225.
7. C. Liu, C. Huang and H. Chang, *Anal. Chem.*, 2009, **81**, 2383.
8. X. Li, B. Xu, H. Lu, Z. Wang, J. Zhang, Y. Zhang, Y. Dong, K. Ma, S. Wen and W. Tian, *Anal. Methods*, 2013, **5**, 438.
9. X. Wang, Q. Xi, L. Peng, J. Ge, Y. Kan, J. Jiang, G. Shen and R. Yu, *Anal. Methods*, 2013, **5**, 5597.
10. W. Wang, Y. Jin, Y. Zhao, X. Yue and C. Zhang, *Biosens. Bioelectron.*, 2013, **41**, 137.
11. L. Guo, D. Nie, C. Qiu, Q. Zheng, H. Wu, P. Ye, Y. Hao, F. Fu and G. Chen, *Biosens. Bioelectron.*, 2012, **35**, 123.
12. Y.-W. Lin, C.-W. Liu and H.-T. Chang, *Talanta*, 2011, **84**, 324.
